# Supplementary material
Source: publisher figshare collection journal article supplement (https://gsajournals.figshare.com/articles/dataset/_/12743378)
Supplement: Supplementary file 1 [file 1]

### NLR Classification

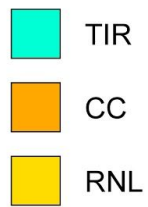

Tree scale: 1

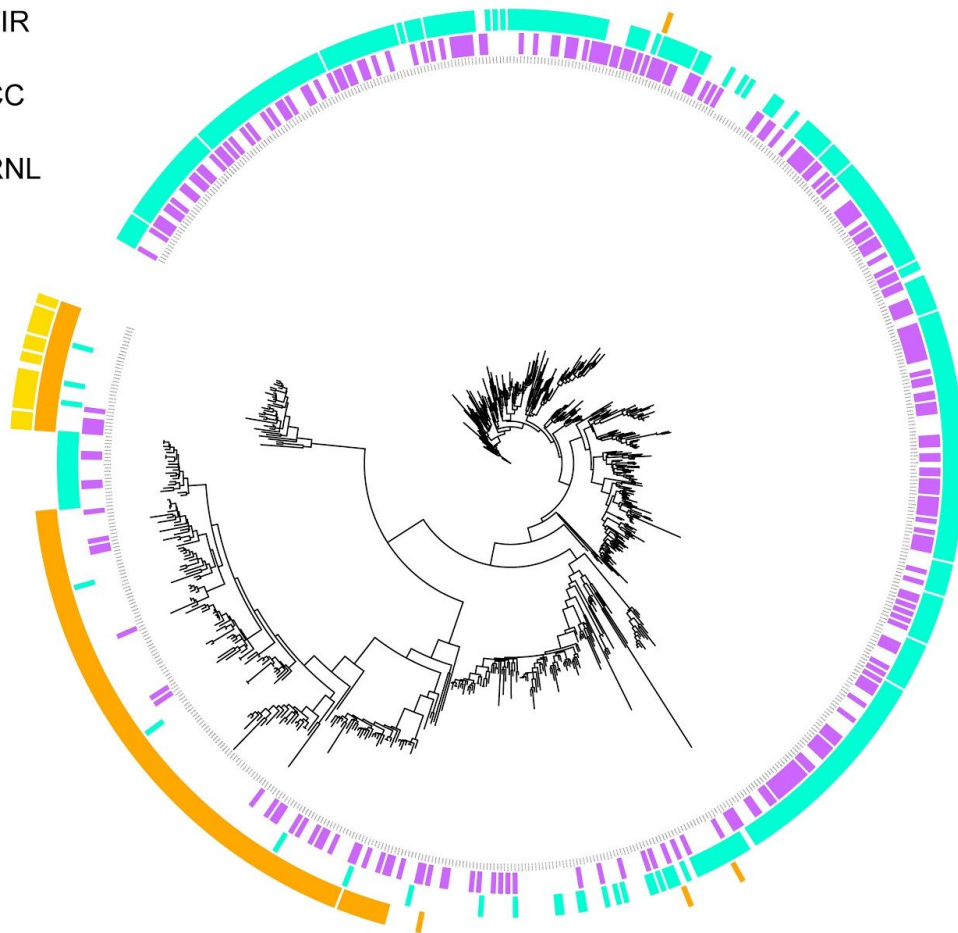

**Figure S3** Maximum likelihood tree of encoded NB-ARC domains of all NLR genes detected by NLR-Annotator

The purple ring identifies consensus NLR genes. N-terminal domains are indicated in the outer rings (TIR- light blue, CC- orange, RNL- yellow).
