# Supplementary material
Source: publisher figshare collection journal article supplement (https://gsajournals.figshare.com/articles/dataset/_/12743378)
Supplement: Supplementary file 2 [file 1]

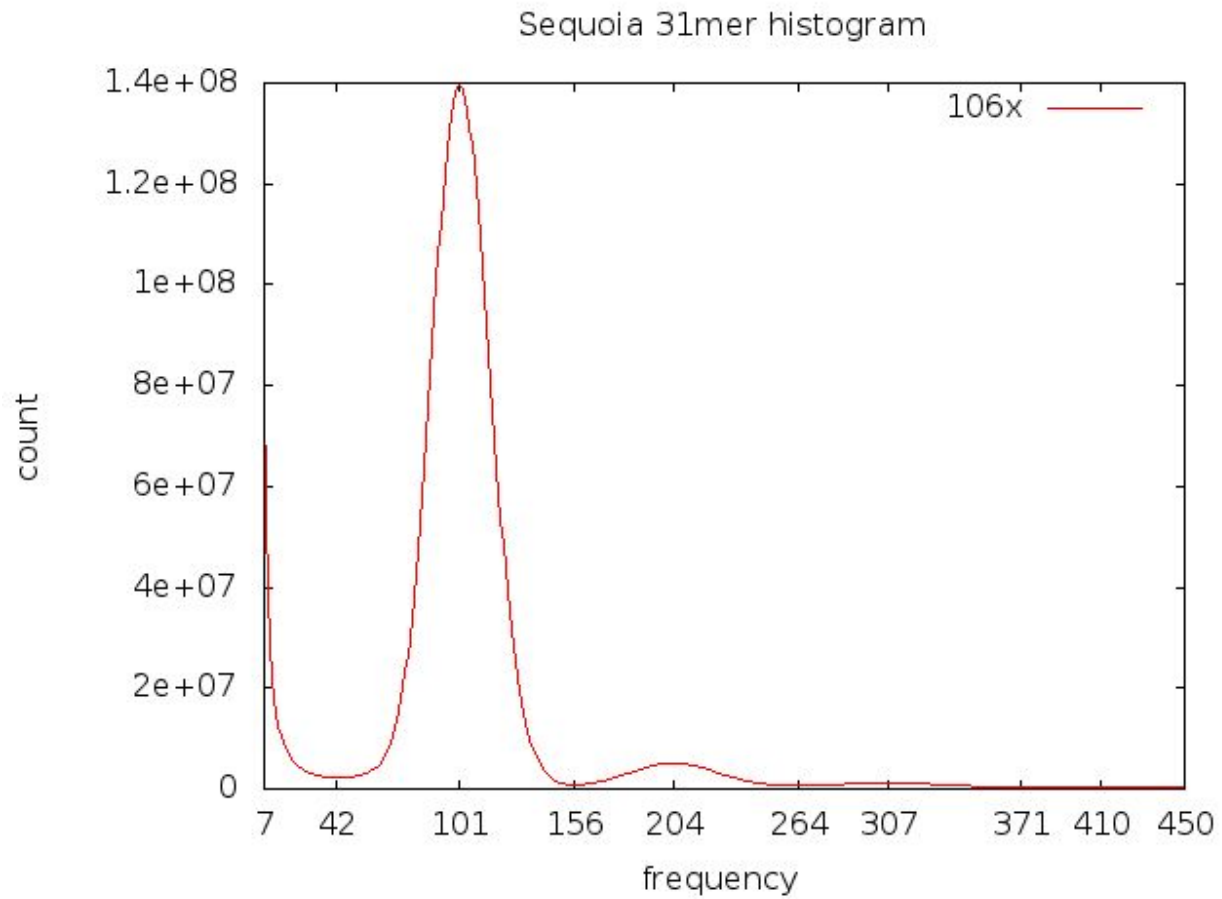

**Figure S1** Histogram of 31-mer count in Illumina paired end reads.

The red curve shows the number of 31-mers that are present in the reads  $X$  times, where  $X$  is the frequency plotted on the horizontal axis. The main peak is at 101.
