# Supplementary material
Source: publisher figshare collection journal article supplement (https://gsajournals.figshare.com/articles/dataset/_/12743378)
Supplement: Supplementary file 3 [file 1]

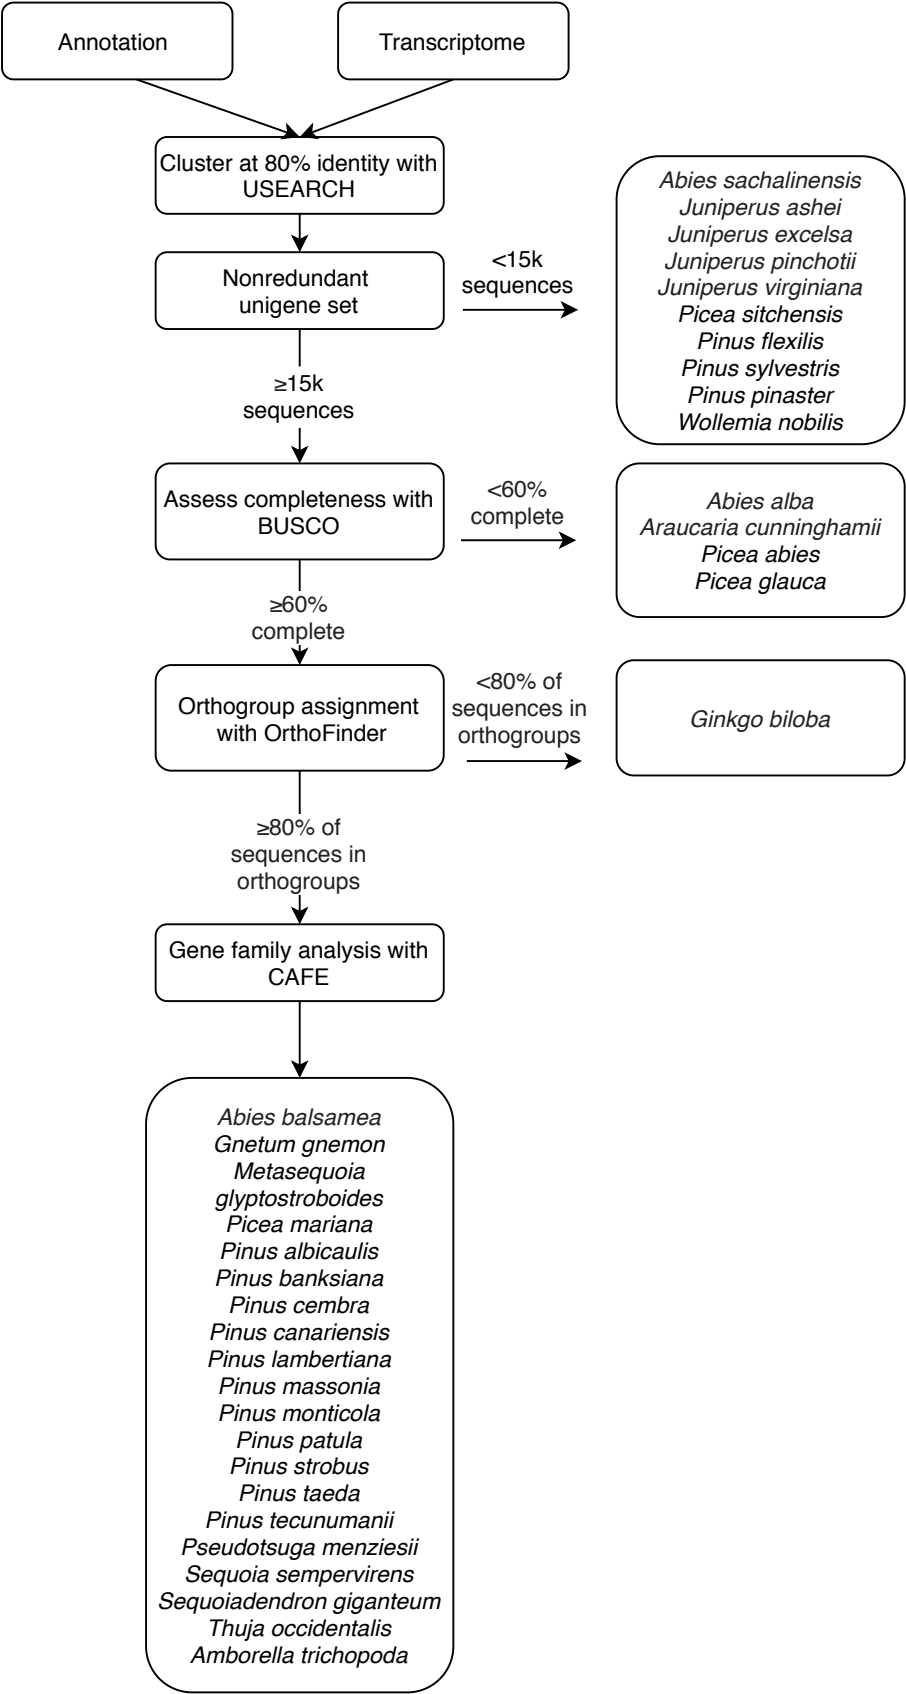

**Figure S2** Gene family evolution analysis pipeline

Protein sequences were concatenated from annotation and transcriptome sources, then clustered with USEARCH at 80% identity. Taxa with at least 15k unigene sequences were assessed for completeness with BUSCO v4.0.2. Taxa with at least 60% completeness were analyzed with OrthoFinder. Taxa with at least 80% of sequences in orthogroups were included in gene family analyses with CAFExp.
